# Supplementary material for: Resveratrol prevents sarcopenic obesity by reversing mitochondrial dysfunction and oxidative stress via the PKA/LKB1/AMPK pathway
Source: publisher site journal article supplement (doi:10.18632/aging.101910), 2019-04-15
Supplement: Supplementary file [file aging-v11i8-101910-supplementary-material-SD1.pdf]

SUPPLEMENTARY MATERIAL

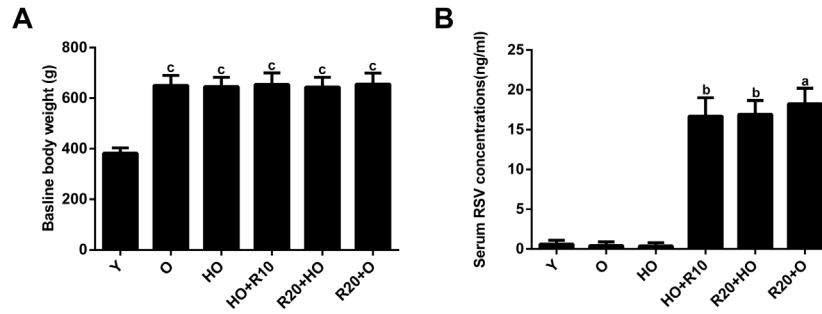

**Figure S1. The baseline body weight and serum RSV concentrations.** (A) The baseline body weight in each group. (B) Serum RSV levels. Data are expressed as the mean  $\pm$  SD. <sup>a</sup>*P* < 0.05 vs. the O group; <sup>b</sup>*P* < 0.05 vs. the HO group; <sup>c</sup>*P* < 0.05 vs. the Y group.

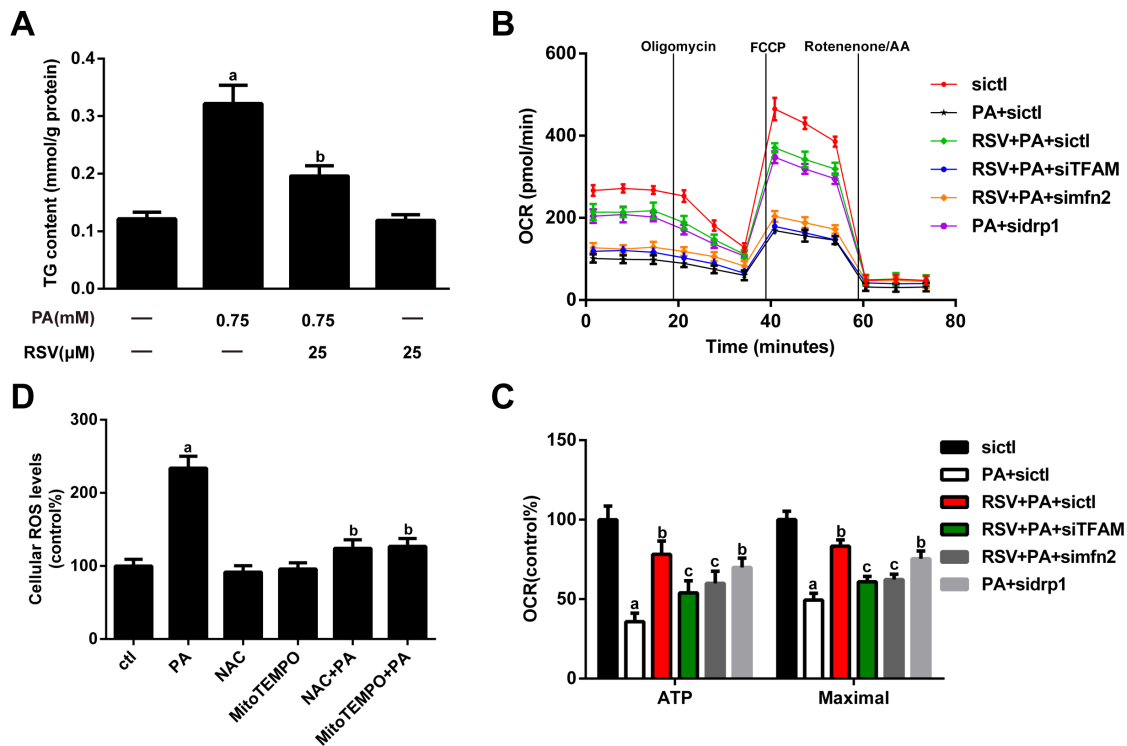

**Figure S2. TG content, OCR and total ROS levels in L6 myotubes.** (A) Intracellular TG content. (B) The respiration curve in each group. (C) The bar graphs show the quantification of ATP production and maximal respiration. (D) Cellular total ROS levels. Data are expressed as the mean  $\pm$  SD. <sup>a</sup>*P* < 0.05 vs. the control group; <sup>b</sup>*P* < 0.05 vs. the PA-treated group; <sup>c</sup>*P* < 0.05 vs. the RSV (25  $\mu$ M) and PA (0.75 mM) cotreated group with control siRNA transfection.
